# Supplementary material
Source: publisher site journal article supplement (https://www.spandidos-publications.com/321/downloadSupplementary)

Figure S1. Confirmation of lncRNA MORT and GLUT1 overexpression in 22Rv1 cells. Reverse transcription-quantitative polymerase chain reaction showed that the overexpression rate of lncRNA MORT and GLUT1 reached 200 and 300% at 24 h after transfection, respectively ( $P<0.05$ ). LncRNA MORT, long non-coding RNA mortal obligate RNA transcript; C, control; NC, negative control.

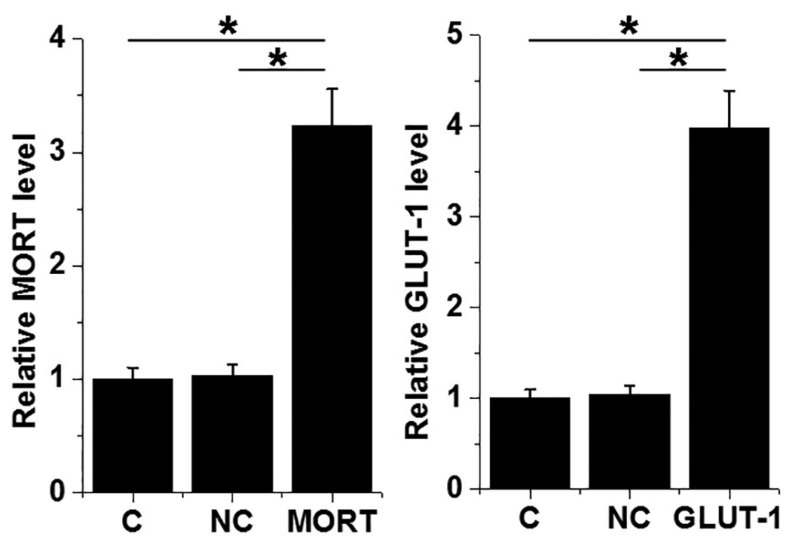

Supplement: Supplementary file 1 [file downloadSupplementary]
